# Supplementary material for: Lithium-rich disordered rock salt Li 1.25 V 0.5 Nb 0.25 O 2 as the anode material for lithium-ion capacitors
Source: Royal Society of Chemistry journal article supplement (doi:10.1039/d5cc07207g), 2026-01-01
Supplement: d5cc07207g1.pdf [file d5cc07207g1.pdf]

## Supplementary Information

Lithium-rich disordered rock salt  $\text{Li}_{1.25}\text{V}_{0.5}\text{Nb}_{0.25}\text{O}_2$  as the anode material  
for lithium-ion capacitors

Jing Gao, Zhonghao Shi, Xiaoyu Zhang, Junze Lu, Rutao Wang\*

E-mail: [rtwang@sdu.edu.cn](mailto:rtwang@sdu.edu.cn)

## Experimental section

### Materials preparation

All chemicals are of analytical grade and are used directly without any purification. The following reagents were purchased from Aladdin Chemicals:  $\text{Li}_2\text{CO}_3$  (AR,  $\geq 99.0\%$ ),  $\text{Nb}_2\text{O}_5$  (AR,  $\geq 99.9\%$ ),  $\text{V}_2\text{O}_3$  (, AR,  $\geq 99.0\%$ ) and 1-Methyl-2-pyrrolidinone (NMP, AR,  $\geq 99.9\%$ ). Polyvinylidene fluoride (PVDF), acetylene black and Li foil are purchased from MTI corporation. The electrolyte, 1 M  $\text{LiPF}_6$  in EC: DMC: EMC=1:1 vol%, was purchased from DoChem of China.

$\text{Li}_{1.25}\text{V}_{0.5}\text{Nb}_{0.25}\text{O}_2$  (named as LVNO) was synthesized by solid phase method. Precursor powders with a total weight of around 2 g were put into an 80 ml agate jar (the powder-to-ball weight ratio of was 1:20) and mixed in air at room temperature under 500 rpm for 10 h (YXQM-1L, MITR). Then, the mixture was sintered in an argon atmosphere at  $950^\circ\text{C}$  for 10 h with a heating rate of  $5^\circ\text{C min}^{-1}$ .

Using polyphenylene derived porous carbon (PDPC) as cathode material for LICs. The PDPC was synthesized according to our previous report. The 80 wt% PDPC, 10 wt% acetylene black and 10 wt% polytetrafluoroethylene (PTFE) were mixed and then were rolled into thin sheets. After heated at  $120^\circ\text{C}$  for 10 h, it was stored in a desiccator.

### Materials characterizations

The morphology of the samples was characterized by scanning electron microscopy (SEM, JSM-7800F, Hitachi). X-ray diffraction (XRD, D/Max-2400, Rigaku, Japan) was performed using  $\text{Cu K}\alpha$  radiation with a scanning range of  $10^\circ$  to  $80^\circ$ . Detailed morphological and structural characterization was conducted using transmission electron microscopy (TEM, JEM-F200, JEOL, Japan).

### Battery Assembly and Testing

For the DRX-LVNO anode fabrication, the as-prepared LVNO, acetylene black, and PVDF with a 6:3:1 mass ratio is mixed in NMP using a mortar. The well-mixed slurry was uniformly coated onto a copper foil and heated at  $80^\circ\text{C}$  for 8 h in a vacuum oven. The film was punched into 14 mm-diameter circular electrodes with an active material mass loading of approximately 1 mg. For the lithium half-cell assembly, the electrodes were assembled in 2032-type coin cells with Li foil, a Celgard 2400 separator, and 1 M  $\text{LiPF}_6$  in EC: DMC: EMC (1:1:1 by volume) within an

Ar-filled glovebox. The O<sub>2</sub> and H<sub>2</sub>O levels inside the box were stably maintained below 0.01 ppm.

For the fabrication of LICs, the anode is pre-lithiated, which the anode is charged and discharged multiple times and finally discharged to 0.01 V at a current density of 0.1 A g<sup>-1</sup> in a half-cell, and then the anode electrode is dismantled in the glove box. LICs were assembled with the pre-lithium anode and the PDPC cathode. Anode and cathode active materials mass ratio is 1:1.

Electrochemical Measurements: Cyclic voltammetry (CV) test, galvanostatic charge/discharge measurements, and electrochemical impedance spectroscopy (EIS) were recorded by a CHI760E (Shanghai China) and IviumStat (Ivium Technologies BV, The Netherlands). Life-span tests for half-cell and hybrid cells were conducted by a battery test system (Land CT2001A model, Wuhan Land Electronics, Ltd.). All electrochemical tests were carried out in a thermostatic chamber. The temperature was controlled at 30 ± 1 °C throughout the entire testing process.

The energy density and power density of the full cells were calculated based on the following equations:

$$E = \int_{t1}^{t2} IV dt$$

$$P = E/t$$

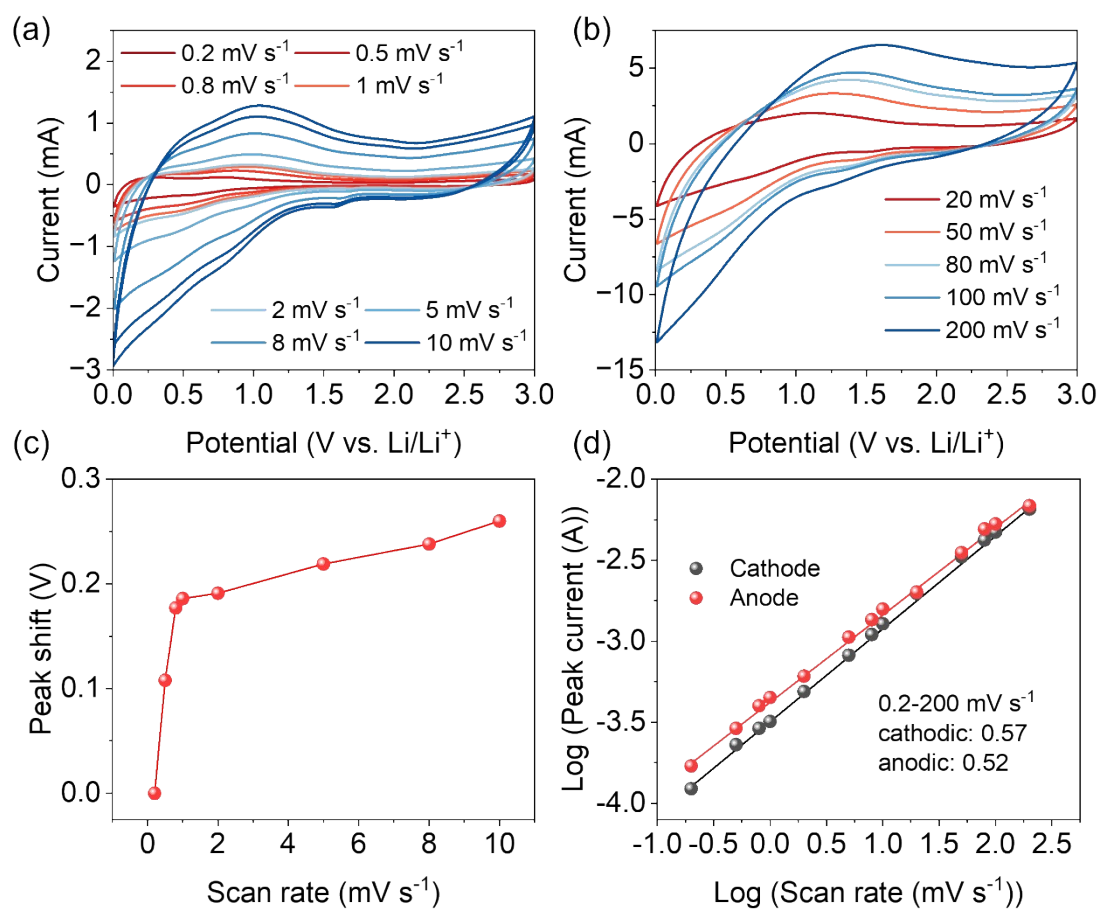

Fig. S1. (a, b) CV curves of LVNO electrode with different scan rates ranging from 0.2 to 200 mV s<sup>-1</sup>. (c) The variation of cathodic peak voltages with the different scan rates ranging from 0.2 to 10 mV s<sup>-1</sup>. (d) b-values determination of the anodic and cathodic peak currents.

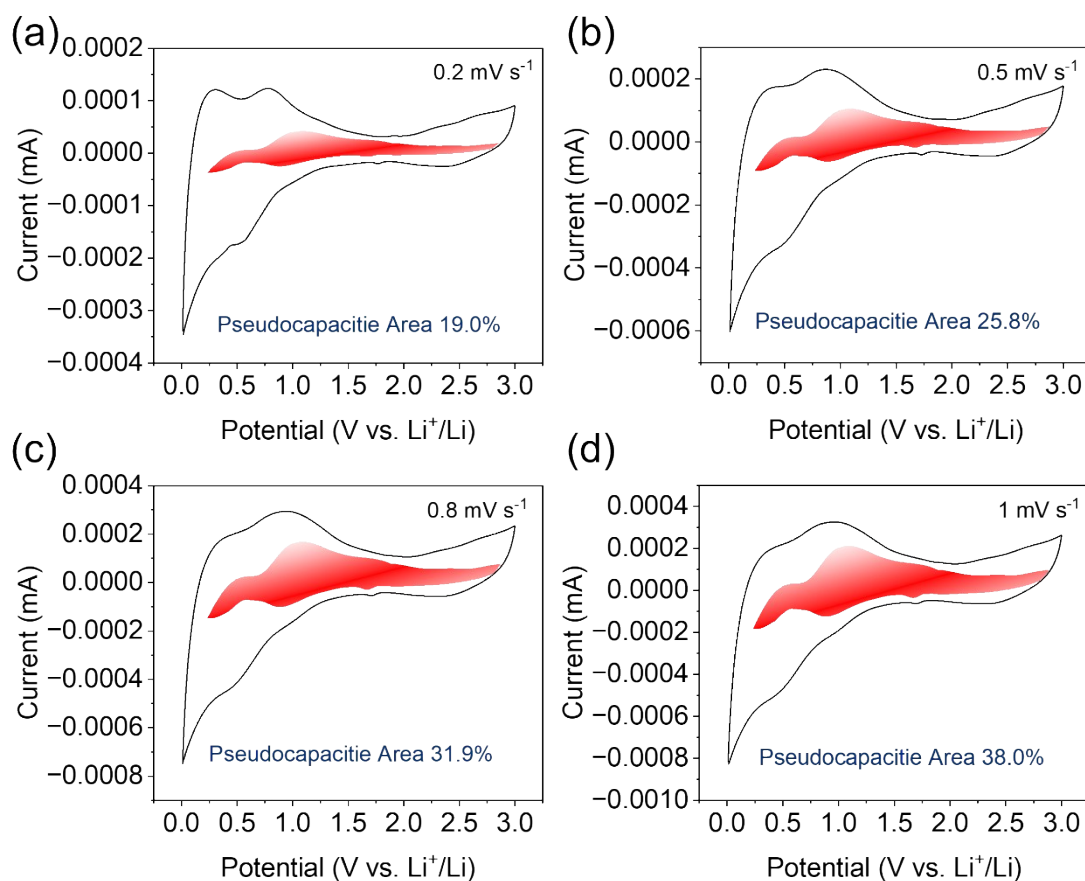

Fig. S2. Capacitive contribution (red region) to the total charge storage at 0.2 mV s<sup>-1</sup> (a), 0.5 mV s<sup>-1</sup> (b), 0.8 mV s<sup>-1</sup> (c), 1 mV s<sup>-1</sup> (d).

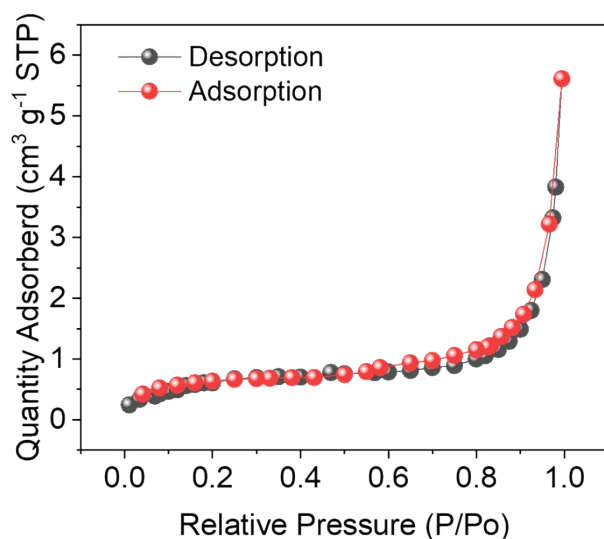

Fig. S3. N<sub>2</sub> adsorption-desorption isotherms of DRX-LVNO.

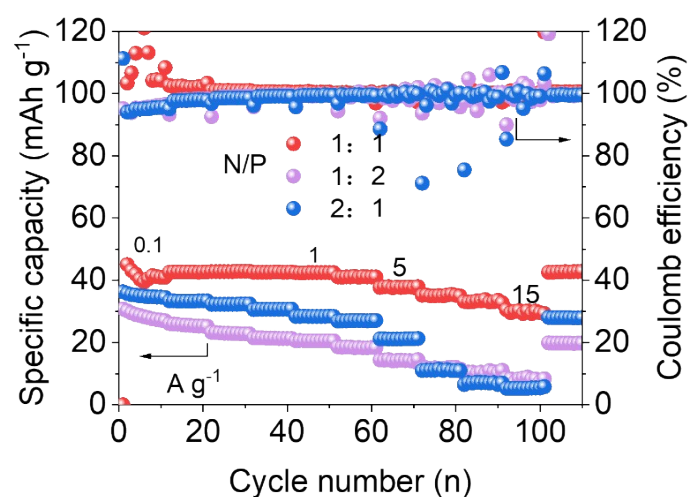

Fig. S4. The electrochemical performance of as-fabricated LIC with the different anode/cathode mass ratios.

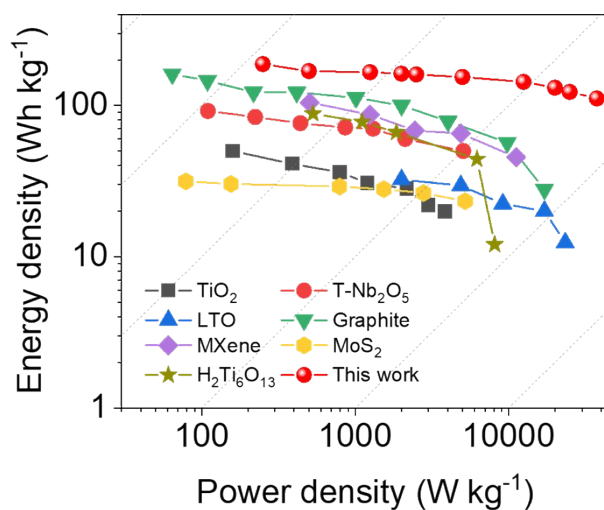

Fig. S5. Ragone plots showing energy and power densities versus other reports.
